# Supplementary material for: Impaired endocytosis of the ion channel TRPM4 is associated with human progressive familial heart block type I
Source: JCI journal article supplement (doi:10.1172/jci38292), 2009-08-18
Supplement: sd1 [file 1]

301 Moved Permanently

# Moved Permanently

The document has moved here.
